# Supplementary material for: Catalytic conversion of methanol/ethanol to isobutanol – a highly selective route to an advanced biofuel
Source: Royal Society of Chemistry journal article supplement (doi:10.1039/c6cc01599a), 2016-01-01
Supplement: c6cc01599a1.pdf [file c6cc01599a1.pdf]

## **Supporting Information**

### **Catalytic conversion of methanol/ethanol to isobutanol – a highly selective route to an advanced biofuel**

*Richard L. Wingad, Emilie J. E. Bergström, Matthew Everett, Katy J. Pellow and Duncan F. Wass\**

School of Chemistry, University of Bristol, Bristol, BS8 1TS, UK

E-mail: Duncan.Wass@bristol.ac.uk

Homepage: <http://www.wassresearchgroup.com/>

#### **Contents:**

|                                    |    |
|------------------------------------|----|
| <b>Experimental</b>                | S2 |
| <i>General considerations</i>      | S2 |
| <i>Synthesis</i>                   | S2 |
| 1) Preparation of complex <b>5</b> | S2 |
| <i>Catalysis</i>                   | S2 |
| 1) Typical catalytic run           | S2 |
| 2) Water inhibition experiment     | S5 |
| 3) Recycling experiments           | S5 |
| 4) Labelling study                 | S6 |
| <i>Spectra</i>                     | S7 |
| <b>References</b>                  | S9 |

## Experimental

### General considerations

All procedures were carried out under an inert atmosphere ( $N_2$ ) using standard Schlenk line techniques or in an inert atmosphere glovebox (Ar). Chemicals were purchased from Sigma-Aldrich and used without further purification unless otherwise stated. Solvents were purified using an anhydrous Engineering Grubbs-type solvent system except anhydrous ethanol and methanol which were purchased from Sigma-Aldrich and used as received. Complexes **1**,<sup>1</sup> **2**,<sup>2</sup> **3**,<sup>3</sup> **4**<sup>4</sup> and **6**<sup>5</sup> were synthesised by literature methods. NMR spectra were recorded on a Jeol ECS300 or a Varian VNMR500 NMR spectrometer.  $^1H$  and  $^{13}C\{^1H\}$  NMR chemical shifts were referenced relative to the residual solvent resonances in the deuterated solvent.  $^{31}P\{^1H\}$  NMR spectra were referenced relative to 85%  $H_3PO_4$  external standard. Mass spectra (ESI) were recorded on a Bruker Daltonics micrOTOF II. All catalytic samples were analysed by GC-FID, using an Agilent 7820A GC, fitted with a DB-WAX capillary column, 30 m x 0.32 mm, I.D. 0.25  $\mu m$ . Method: starting oven temp 35  $^{\circ}C$ , hold at 35  $^{\circ}C$  for 5 min, heat to 250  $^{\circ}C$  at 50  $^{\circ}C\ min^{-1}$ , hold at 250  $^{\circ}C$  for 5 min.

### Synthesis

#### 1) Preparation of complex 5

A solution of 2-(diphenylphosphino)-*N*-methylethanamine (0.51 g, 2.1 mmol) in toluene (10 mL) was added to a stirred solution of tris(triphenylphosphine)ruthenium(II) dichloride (1.00 g, 1.04 mmol) in toluene (30 mL). The mixture was stirred at 100  $^{\circ}C$  for 6 h, after which time the resulting suspension was allowed to cool and then filtered. The solid was washed with toluene ( $4 \times 20$  mL), until the filtrate was colourless, and dried under reduced pressure to give complex **5** (0.41 g, 60%) as an orange solid;  $^1H$  NMR (300 MHz,  $CD_2Cl_2$ )  $\delta$  7.28–6.99 (20H, m, ArH), 4.03 (2H, br s, NH), 3.44–3.28 (2H, m, CHH), 2.79–2.74 (12H, m, CHHCH<sub>2</sub> and CH<sub>3</sub>);  $^{31}P$  NMR (162 MHz,  $CD_2Cl_2$ ):  $\delta$  = 60.2 (minor, s) 58.6 (major, s). ESI-MS: 658.07 [ $M^+$ ], 623.11 [ $M^+ - Cl$ ]. For spectra see Figures S1–S2.

### Catalysis

Catalytic reactions were carried out in a 100 mL Parr stainless steel autoclave with aluminium heating mantle and using magnetic stirring. A typical procedure is shown below. Full catalytic results are shown in Table S1.

#### 1) Typical catalytic run

*trans*-[RuCl<sub>2</sub>(dppm)]<sub>2</sub> (0.016 g, 0.017 mmol, 0.1 mol%) and sodium methoxide (1.85 g, 34.26 mmol, 200 mol%) were added to a clean oven-dried fitted PTFE insert. The insert was then sealed within the autoclave which was evacuated and re-filled with nitrogen 3 times. Methanol (10 mL) was injected into the autoclave through an inlet against a flow of nitrogen followed by ethanol (1 mL, 17.13 mmol). The autoclave was sealed and placed into the pre-heated (180  $^{\circ}C$ ) aluminium heating mantle for 2 h. After the reaction run time, the autoclave was cooled to room temperature in an ice-water bath. The autoclave was vented to remove any gas generated during the reaction. A liquid sample was removed, filtered through a short plug of alumina (acidic) and analysed by GC (100  $\mu L$  of sample, 25  $\mu L$  of *n*-pentanol standard, 1 mL MeOH).

**Table S1.** Ruthenium catalysed conversion of ethanol and methanol to isobutanol

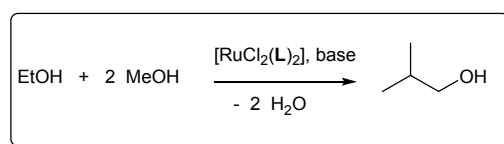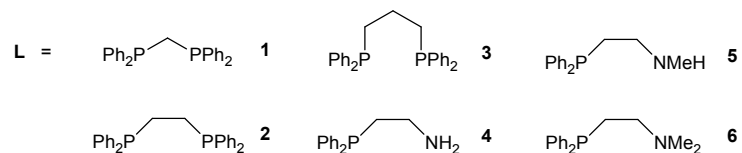

| Run <sup>[a]</sup>      | Complex<br>(mol%) <sup>[b]</sup>                      | Base (mol%) <sup>[b]</sup> | Temp/°C | Run Time/h | EtOH<br>Conversion <sup>[c]</sup> | TON <sup>[d]</sup> (Selectivity) <sup>[e]</sup> [Yield] |                    |             |
|-------------------------|-------------------------------------------------------|----------------------------|---------|------------|-----------------------------------|---------------------------------------------------------|--------------------|-------------|
|                         |                                                       |                            |         |            |                                   | Isobutanol                                              | <i>n</i> -Propanol | Other       |
| <b>1</b>                | [RuCl <sub>2</sub> ( <b>1</b> ) <sub>2</sub> ] (0.1)  | NaOMe (200)                | 180     | 2          | 66.4                              | 651(98.1)[65.1]                                         | 12(1.8)[1.2]       | 1(0.1)[0.1] |
| <b>2</b>                | [RuCl <sub>2</sub> ( <b>2</b> ) <sub>2</sub> ] (0.1)  | NaOMe (200)                | 180     | 2          | 3.3                               | 31(95.4)[3.1]                                           | 2(4.6)[0.2]        | -           |
| <b>3</b>                | [RuCl <sub>2</sub> ( <b>3</b> ) <sub>2</sub> ] (0.1)  | NaOMe (200)                | 180     | 2          | 4.7                               | 28(59.2)[2.8]                                           | 19(40.8)[1.9]      | -           |
| <b>4</b>                | [RuCl <sub>2</sub> ( <b>4</b> ) <sub>2</sub> ] (0.1)  | NaOMe (200)                | 180     | 2          | 41.6                              | 383(92.3)[38.3]                                         | 30(7.3)[3.0]       | 3(0.4)[0.3] |
| <b>5</b>                | [RuCl <sub>2</sub> ( <b>4</b> ) <sub>2</sub> ] (0.1)  | NaOMe (200)                | 180     | 20         | 56.3                              | 505(89.7)[50.5]                                         | 56(9.9)[5.6]       | 5(0.4)[0.5] |
| <b>6</b>                | [RuCl <sub>2</sub> ( <b>5</b> ) <sub>2</sub> ] (0.1)  | NaOMe (200)                | 180     | 20         | 48.6                              | 464(95.5)[46.4]                                         | 20(4.2)[2.0]       | 3(0.3)[0.3] |
| <b>7</b>                | [RuCl <sub>2</sub> ( <b>6</b> ) <sub>2</sub> ] (0.1)  | NaOMe (200)                | 180     | 20         | 31.1                              | 290(93.2)[29.0]                                         | 20(6.5)[2.0]       | 2(0.3)[0.2] |
| <b>8</b>                | [RuCl <sub>2</sub> ( <b>1</b> ) <sub>2</sub> ] (0.1)  | NaO <sup>t</sup> Bu (200)  | 180     | 2          | 55.2                              | 541(98.0)[54.1]                                         | 10(1.9)[1.0]       | 1(0.1)[0.1] |
| <b>9</b>                | [RuCl <sub>2</sub> ( <b>1</b> ) <sub>2</sub> ] (0.1)  | NaOH (200)                 | 180     | 2          | 73.8                              | 706(95.6)[70.6]                                         | 32(4.4)[3.2]       | 1(0.1)[0.1] |
| <b>10</b>               | [RuCl <sub>2</sub> ( <b>1</b> ) <sub>2</sub> ] (0.1)  | KOH (200)                  | 180     | 2          | 60.8                              | 577(94.9)[57.7]                                         | 30(4.9)[3.0]       | 2(0.2)[0.2] |
| <b>11</b>               | [RuCl <sub>2</sub> ( <b>1</b> ) <sub>2</sub> ] (0.1)  | NaOMe (150)                | 180     | 2          | 69.6                              | 679(97.5)[67.9]                                         | 24(2.5)[2.4]       | -           |
| <b>12</b>               | [RuCl <sub>2</sub> ( <b>1</b> ) <sub>2</sub> ] (0.1)  | NaOMe (100)                | 180     | 2          | 49.9                              | 467(93.6)[46.7]                                         | 31(6.2)[3.1]       | 2(0.2)[0.2] |
| <b>13</b>               | [RuCl <sub>2</sub> ( <b>1</b> ) <sub>2</sub> ] (0.1)  | NaOMe (50)                 | 180     | 2          | 12.0                              | 108(90.2)[10.8]                                         | 11(8.9)[1.1]       | 2(0.8)[0.2] |
| <b>14</b>               | [RuCl <sub>2</sub> ( <b>1</b> ) <sub>2</sub> ] (0.1)  | NaOMe (200)                | 120     | 20         | 11.2                              | 91(81.2)[9.1]                                           | 21(18.6)[2.1]      | 1(0.3)[0.1] |
| <b>15</b>               | [RuCl <sub>2</sub> ( <b>1</b> ) <sub>2</sub> ] (0.1)  | NaOMe (200)                | 150     | 20         | 67.1                              | 644(96.0)[64.4]                                         | 26(3.9)[2.6]       | 1(0.1)[0.1] |
| <b>16</b>               | [RuCl <sub>2</sub> ( <b>1</b> ) <sub>2</sub> ] (0.1)  | NaOMe (200)                | 180     | 20         | 75.2                              | 750(99.8)[75.0]                                         | 1(0.1)[0.1]        | 2(0.1)[0.2] |
| <b>17</b>               | [RuCl <sub>2</sub> ( <b>1</b> ) <sub>2</sub> ] (0.1)  | NaOH (200)                 | 180     | 2          | 66.7                              | 640(96.0)[64.0]                                         | 26(3.9)[2.6]       | 1(0.1)[0.1] |
| <b>18<sup>[f]</sup></b> | -                                                     | -                          | 180     | 2          | 41.7                              | 391(93.8)[39.1]                                         | 26(6.2)[2.6]       | -           |
| <b>19</b>               | [RuCl <sub>2</sub> ( <b>1</b> ) <sub>2</sub> ] (0.1)  | NaOMe (200)                | 180     | 2          | 65.4                              | 636(97.6)[63.6]                                         | 13(2.0)[1.3]       | 5(0.4)[0.5] |
| <b>20<sup>[g]</sup></b> | [RuCl <sub>2</sub> ( <b>1</b> ) <sub>2</sub> ] (0.05) | NaOMe (200)                | 180     | 2          | 51.7                              | 508(98.2)[50.8]                                         | 9(1.8)[0.9]        | -           |

|                          |                                                       |             |     |   |      |                 |              |   |
|--------------------------|-------------------------------------------------------|-------------|-----|---|------|-----------------|--------------|---|
| <b>21</b> <sup>[h]</sup> | [RuCl <sub>2</sub> ( <b>1</b> ) <sub>2</sub> ] (0.03) | NaOMe (200) | 180 | 2 | 42.5 | 417(98.0)[41.7] | 8(2.0)[0.8]  | - |
| <b>22</b> <sup>[i]</sup> | [RuCl <sub>2</sub> ( <b>1</b> ) <sub>2</sub> ] (0.1)  | NaOH (200)  | 180 | 2 | 73.0 | 709(97.1)[70.9] | 21(2.9)[2.1] | - |

[a] Conditions: 1 mL ethanol, 10 mL methanol. [b] mol% based on ethanol substrate. [c] Total conversion of ethanol to liquid products, isobutanol, *n*-propanol and *n*-butanol. [d] TON based on mmol of substrate converted to products per mmol of Ru. [e] Total selectivity to products in the liquid fraction determined by GC. [f] Solid product from run 17 used as catalyst/base, fresh ethanol (1 mL) and methanol (10 mL) added. [g] A solution of NaOMe (34.26 mmol) in ethanol/methanol (1/10 mL) was added to the product mixture from run 19, [Ru] = 0.05 mol% based on ethanol. [h] A solution of NaOMe (34.26 mmol) in ethanol/methanol (1/10 mL) was added to the product mixture from run 20, [Ru] = 0.03 mol% based on ethanol. [i] 0.62 mL water added.

## 2) Water inhibition experiment

*trans*-[RuCl<sub>2</sub>(dppm)]<sub>2</sub> (0.016 g, 0.017 mmol, 0.1 mol%) and powdered sodium hydroxide (1.37 g, 34.26 mmol, 200 mol%) were added to a clean oven-dried fitted PTFE insert. The insert was then sealed within the autoclave which was evacuated and re-filled with nitrogen 3 times. Methanol (10 mL) was injected into the autoclave through an inlet against a flow of nitrogen followed by ethanol (1 mL, 17.13 mmol) and degassed water (0.62 mL, 34.41 mmol, 201 mol%). The autoclave was sealed and placed into the pre-heated (180 °C) aluminium heating mantle for 2 h. After the reaction run time, the autoclave was cooled to room temperature in an ice-water bath. The autoclave was vented to remove any gas generated during the reaction. A liquid sample was removed, filtered through a short plug of alumina (acidic) and analysed by GC (100 µL of sample, 25 µL of *n*-pentanol standard, 1 mL MeOH). Results are shown in Table S1.

## 3) Recycling experiments

### 3.1. Addition of fresh substrate

*trans*-[RuCl<sub>2</sub>(dppm)]<sub>2</sub> (0.016 g, 0.017 mmol, 0.1 mol%), and powdered sodium hydroxide (1.37 g, 34.26 mmol, 200 mol%) were added to a clean oven-dried fitted PTFE insert. The insert was then sealed within the autoclave which was then evacuated and re-filled with nitrogen 3 times. Methanol (10 mL) was injected into the autoclave through an inlet against a flow of nitrogen followed by ethanol (1 mL, 17.13 mmol). The autoclave was sealed and placed into the pre-heated (180 °C) aluminium heating mantle for 2 h. After the reaction run time, the autoclave was cooled to room temperature in an ice-water bath. The autoclave was vented to remove any gas generated during the reaction through a N<sub>2</sub>/vacuum manifold to ensure the autoclave contents were kept under an inert atmosphere. A liquid sample was removed, filtered through a short plug of alumina (acidic) and analysed by GC (100 µL of sample, 25 µL of *n*-pentanol standard, 1 mL MeOH). Liquid products were removed from the autoclave by vacuum transfer for 6 h at 60 °C. The autoclave was transferred to a glove box and opened. The white solid residue was scraped off the sleeve walls and ground into a fine powder. This powder was placed back into the PTFE insert, sealed within the autoclave and transferred to the N<sub>2</sub>/vacuum manifold. Fresh methanol (10 mL) and ethanol (1 mL) were added and the catalysis was repeated as above. Results are shown in Table S1.

### 3.2. Addition of fresh base and substrate

*trans*-[RuCl<sub>2</sub>(dppm)]<sub>2</sub> (0.016 g, 0.017 mmol, 0.1 mol%), and sodium methoxide (1.85 g, 34.26 mmol, 200 mol%) were added to a clean oven-dried fitted PTFE insert. The insert was then sealed within the autoclave which was then evacuated and re-filled with nitrogen 3 times. Methanol (10 mL) was injected into the autoclave through an inlet against a flow of nitrogen followed by ethanol (1 mL, 17.13 mmol). The autoclave was sealed and placed into the pre-heated (180 °C) aluminium heating mantle for 2 h. After the reaction run time, the autoclave was cooled to room temperature in an ice-water bath. The autoclave was vented to remove any gas generated during the reaction through a N<sub>2</sub>/vacuum manifold to ensure the autoclave contents were kept under an inert atmosphere. A liquid sample was removed, filtered through a short plug of alumina (acidic) and analysed by GC (100 µL of sample, 25 µL of *n*-pentanol standard, 1 mL MeOH). A solution of sodium methoxide (1.85 g, 34.26 mmol) dissolved in ethanol/methanol (1/10 mL) was injected into the autoclave through an inlet against a flow of nitrogen and the catalysis was repeated as above. After 2 hours the autoclave was allowed to cool and vented through a N<sub>2</sub>/vacuum manifold. A liquid sample was removed for GC analysis. A solution of sodium methoxide (1.85 g, 34.26 mmol) dissolved in ethanol/methanol (1/10 mL) was injected into the autoclave through an inlet against a flow of nitrogen and the catalysis was

repeated once more as above. Results are shown in Table S1. A bar chart showing mmol of isobutanol formed during each cycle is shown in Figure S1.

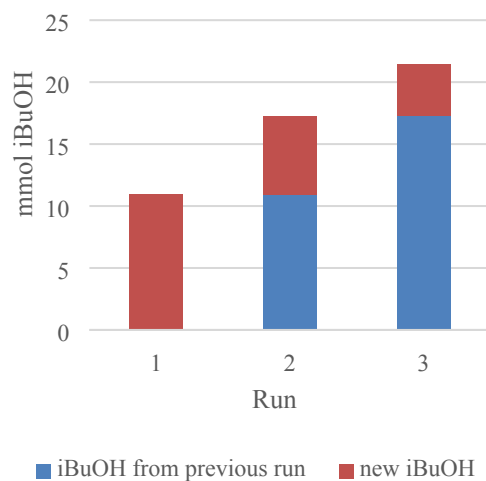

Figure S1. Bar chart showing mmol of isobutanol present in the autoclave after each cycle.

## 2) Labelling study

*trans*-[RuCl<sub>2</sub>(dppm)]<sub>2</sub> (0.016 g, 0.017 mmol, 0.1 mol%), and sodium methoxide (1.85 g, 34.26 mmol, 200 mol%) were added to a clean oven-dried fitted PTFE insert. The insert was then sealed within the autoclave which was then evacuated and re-filled with nitrogen 3 times. Methanol (9.5 mL) was injected into the autoclave through an inlet against a flow of nitrogen followed by <sup>13</sup>C labelled methanol (0.5 mL) and ethanol (1 mL, 17.13 mmol). The autoclave was sealed and placed into the pre-heated (180 °C) aluminium heating mantle for 2 h. After the reaction run time, the autoclave was cooled to room temperature in an ice-water bath. The autoclave was vented to remove any gas generated during the reaction. A liquid sample was removed (0.7 mL) and analysed by <sup>13</sup>C{<sup>1</sup>H} NMR spectroscopy. The spectrum was compared to that obtained from a standard run (see Figures S4 and S5). GC analysis indicated isobutanol was produced in a yield of 65.1% (98.3% selectivity in the liquid fraction).

## Spectra

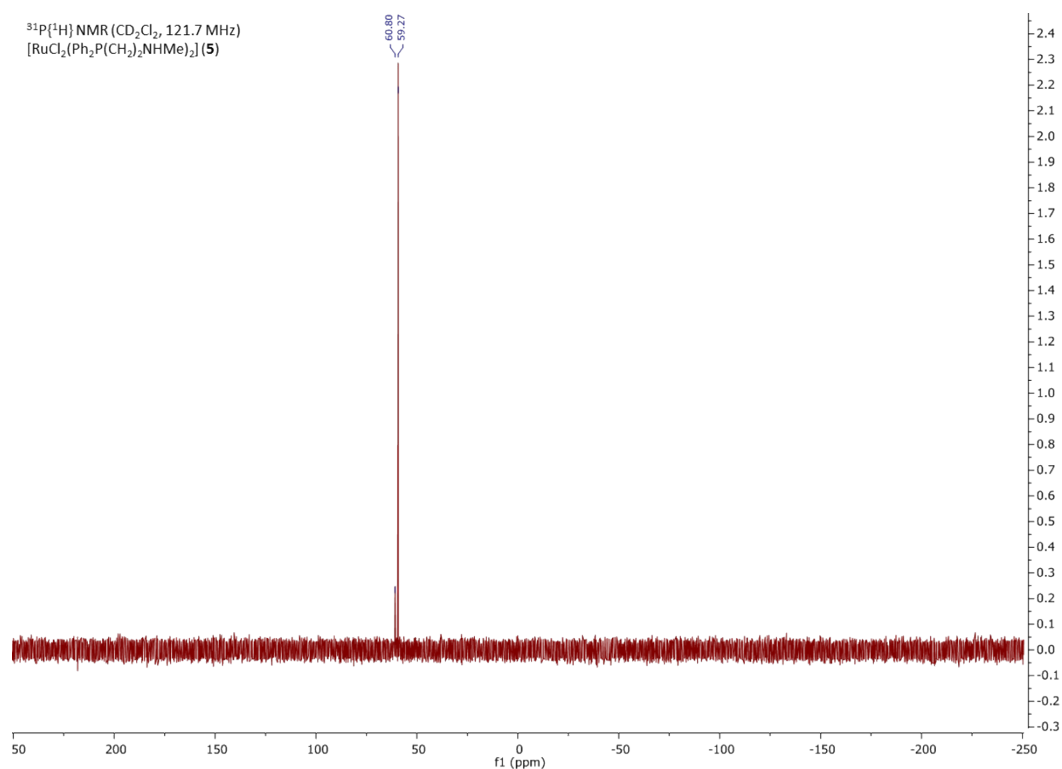

**Figure S2.**  $^{31}\text{P}\{^1\text{H}\}$  NMR spectrum of  $[\text{RuCl}_2(\text{Ph}_2\text{P}(\text{CH}_2)_2\text{NHMe})_2]$ , **5** in  $\text{CD}_2\text{Cl}_2$

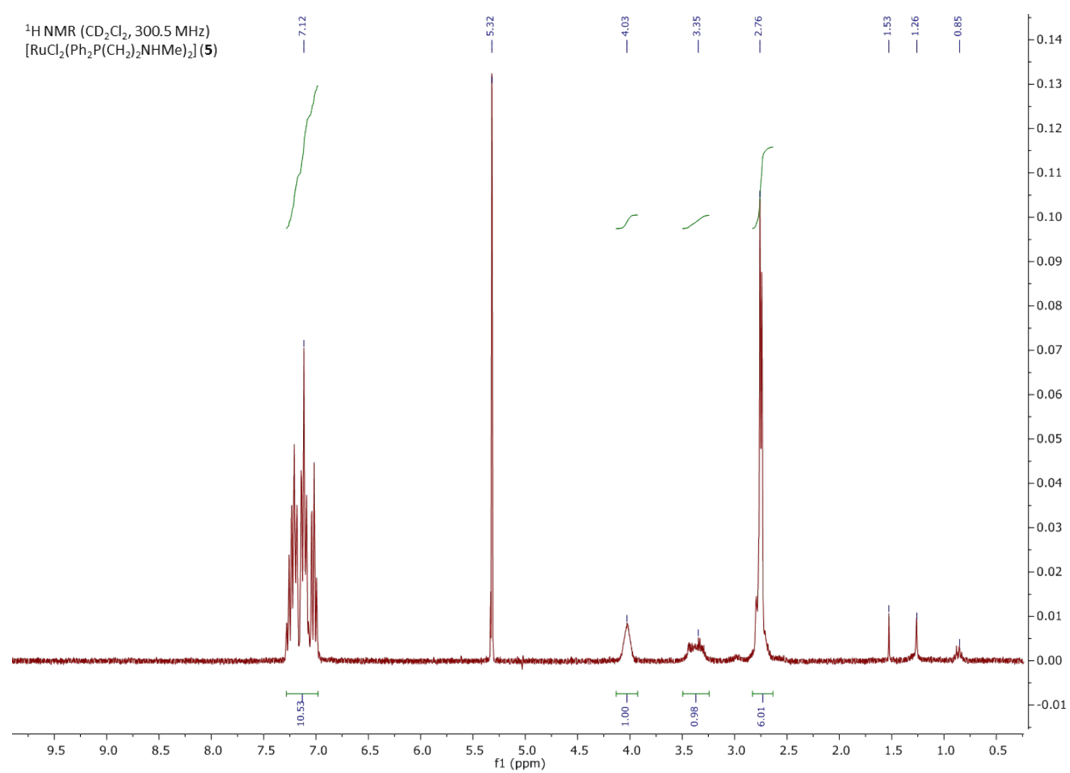

**Figure S3.**  $^1\text{H}$  NMR spectrum of  $[\text{RuCl}_2(\text{Ph}_2\text{P}(\text{CH}_2)_2\text{NHMe})_2]$ , **5** in  $\text{CD}_2\text{Cl}_2$

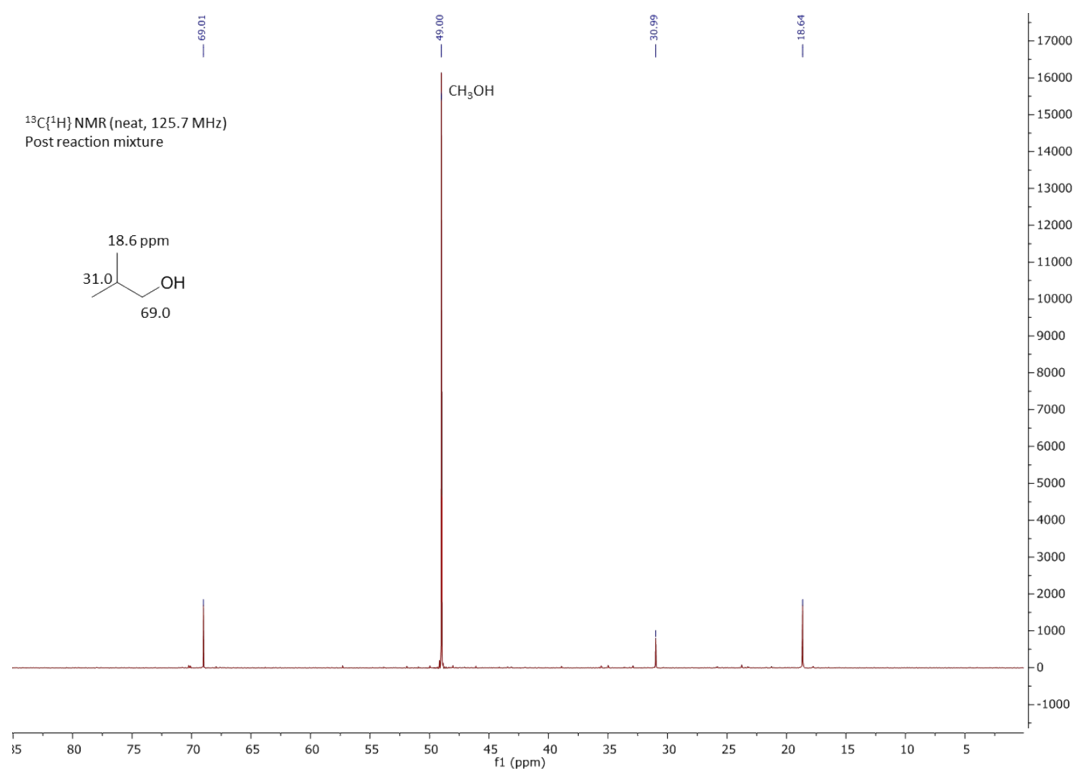

**Figure S4.** <sup>13</sup>C{<sup>1</sup>H} NMR spectrum of post catalysis mixture of a standard run (10 mL CH<sub>3</sub>OH, 1 mL EtOH, 200 mol% NaOMe, 0.1 mol% [RuCl<sub>2</sub>(dppm)<sub>2</sub>] (**1**), 180 °C, 2h)

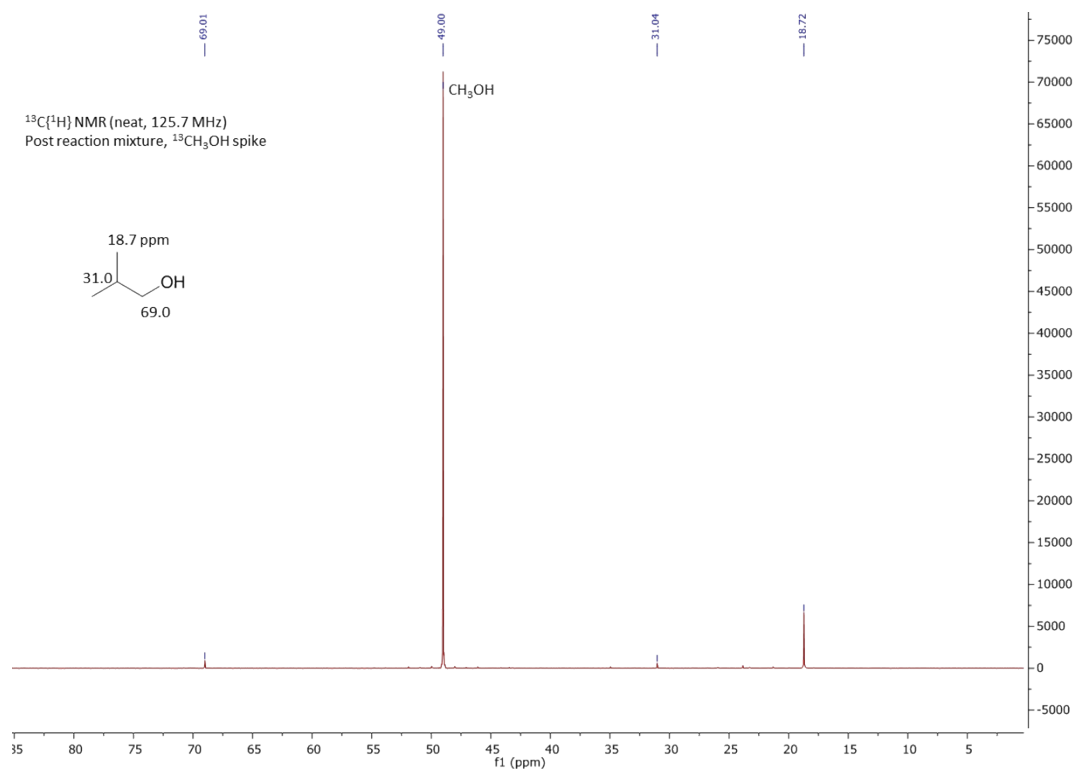

**Figure S5.** <sup>13</sup>C{<sup>1</sup>H} NMR spectrum of post catalysis mixture of run spiked with <sup>13</sup>C labelled methanol (9.5 mL MeOH, 0.5 mL <sup>13</sup>CH<sub>3</sub>OH, 1 mL EtOH, 200 mol% NaOMe, 0.1 mol% [RuCl<sub>2</sub>(dppm)<sub>2</sub>] (**1**), 180 °C, 2h)



## References

---

- <sup>1</sup> J. Chatt and R. G. Hayter, *J. Chem. Soc.*, 1961, 896.
- <sup>2</sup> M. A. Fox, M. J. E. Harris, S. Heider, V. Pérez-Gregorio, M. E. Zakrzewska, J. D. Farmer, D. S. Yufit, J. A. K. Howard and P. J. Low, *J. Organomet. Chem.*, 2009, **694**, 2350.
- <sup>3</sup> I. Warad, Z. Al-Othman, S. Al-Resayes, S. S. Al-Deyab and E.-R. Kenaey, *Molecules*, 2010, **15**, 1028.
- <sup>4</sup> L. Saudan, P. Dupau, J. J. Riedhauser and P. Wyss, *US. Pat. Appl. Publ.*, 2010, US20100280273 A1 20101104.
- <sup>5</sup> R. Morris, A. Habtemariam, Z. Guo, S. Parsons and P. J. Sadler, *Inorg. Chim. Acta*, 2002, **339**, 551.
